# Supplementary material for: Structural insights into auxin recognition and efflux by Arabidopsis PIN1
Source: PubMed Central journal article supplement (PMC9477737; doi:10.1038/s41586-022-05143-9), 2022-08-02
Supplement: 41586_2022_5143_MOESM1_ESM.pdf [file 41586_2022_5143_MOESM1_ESM.pdf]

**Supplementary information**

---

**Structural insights into auxin recognition  
and efflux by *Arabidopsis* PIN1**

---

In the format provided by the  
authors and unedited

**Extended Data Fig. 2a**

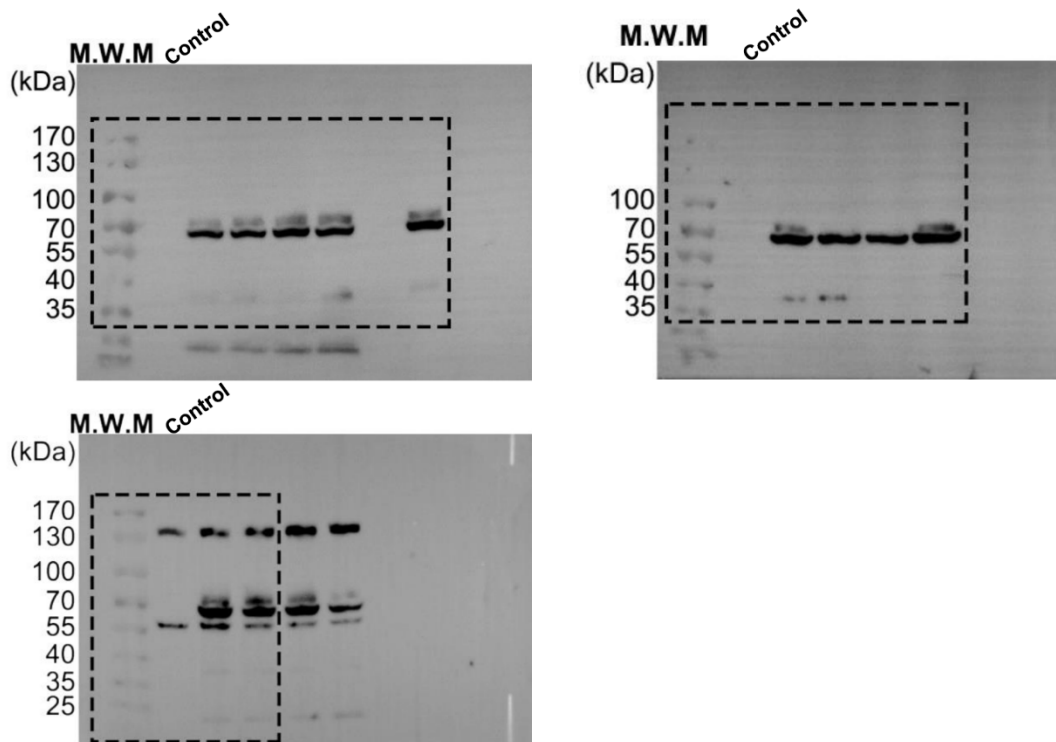

**Extended Data Fig. 2d**

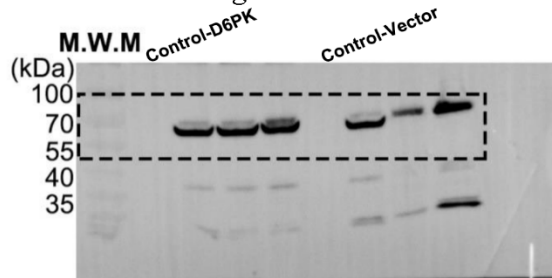

**Extended Data Fig. 2g**

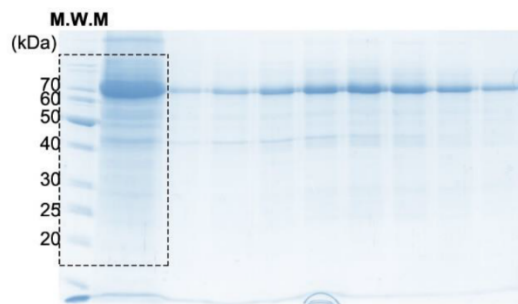

**Extended Data Fig. 3a**

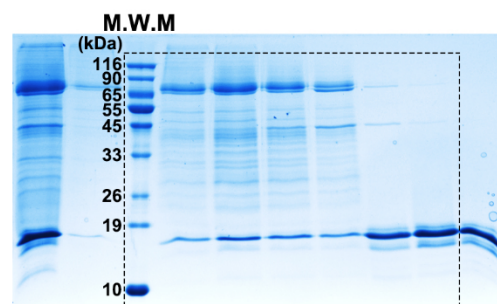

**Supplementary Figure 1. Uncropped western blot or Coomassie-blue staining SDS-PAGE gel scans.** The cropped areas for use in the figures are indicated by a black dashed box.
